# Supplementary material
Source: Royal Society of Chemistry journal article supplement (doi:10.1039/d6ay00201c)
Supplement: d6ay00201c1.pdf [file d6ay00201c1.pdf]

## Supplementary information

**Table S1** The concentration of target compounds in standard solution

| Compounds                      | C0(µg/mL) | C1 (µg/mL) | C2 (µg/mL) | C3 (µg/mL) | C4 (µg/mL) |
|--------------------------------|-----------|------------|------------|------------|------------|
| Hexanal                        | 0         | 50         | 100        | 200        | 400        |
| 2-Pentylfuran                  | 0         | 2.5        | 5          | 10         | 20         |
| Octanal                        | 0         | 5          | 10         | 20         | 40         |
| 2-AP                           | 0         | 50         | 100        | 200        | 400        |
| ( <i>E</i> )-2-Octenal         | 0         | 7.5        | 15         | 30         | 60         |
| 1-Octen-3-ol                   | 0         | 7.5        | 15         | 30         | 60         |
| Decanal                        | 0         | 5          | 10         | 20         | 40         |
| ( <i>E</i> )-2-Nonenal         | 0         | 2.5        | 5          | 10         | 20         |
| ( <i>E, E</i> )-2,4-Decadienal | 0         | 5          | 10         | 20         | 40         |

**Table S2** The retention time and characteristic ions of volatile compounds

| Compounds                      | CAS        | Retention time (min) | Qualitative ions (m/z) |
|--------------------------------|------------|----------------------|------------------------|
| Hexanal                        | 66-25-1    | 7.503                | 56*, 72, 82            |
| 2-Methyl-3-heptanone           | 13019-20-0 | 10.281               | 71, 85, 128*           |
| 2-Pentylfuran                  | 3777-69-3  | 12.435               | 81*, 82, 95, 138       |
| Octanal                        | 124-13-0   | 14.137               | 84*, 100, 110          |
| 2-AP                           | 85213-22-5 | 15.582               | 66, 83*, 111           |
| ( <i>E</i> )-2-Octenal         | 2548-87-0  | 18.064               | 69, 97*, 108           |
| 1-Octen-3-ol                   | 3391-86-4  | 18.818               | 71, 72*, 85, 99        |
| Decanal                        | 112-31-2   | 19.944               | 82, 95, 112*, 128      |
| ( <i>E</i> )-2-Nonenal         | 18829-56-6 | 20.829               | 96*, 111, 122          |
| ( <i>E, E</i> )-2,4-Decadienal | 25152-84-5 | 27.181               | 81, 123, 152*          |

Note: \* represented the quantitative ions.

**Table S3** The physicochemical properties of target compounds

| Compounds                     | Odor description <sup>a</sup>                              | Odor threshold <sup>b</sup><br>(ng·g <sup>-1</sup> ) | Boiling point <sup>c</sup><br>(°C) | Vapour pressure <sup>c</sup><br>(mmHg at 25°C) | Molecular weight <sup>c</sup> |
|-------------------------------|------------------------------------------------------------|------------------------------------------------------|------------------------------------|------------------------------------------------|-------------------------------|
| Hexanal                       | Fruity, grass, green, green tomato, grass-like             | 5                                                    | 127.9                              | 10.9                                           | 100.161                       |
| 2-Pentylfuran                 | Floral, fruity, nutty, almond, beany, green, buttery       | 5.8                                                  | 169.7                              | 2.0                                            | 138.210                       |
| Octanal                       | Citrus, floral, Lemon, green, fat, slightly fruity         | 0.0587                                               | 163.4                              | 2.1                                            | 128.215                       |
| 2-AP                          | Popcorn-like, sweet, pleasant, peanut, cooked jasmine rice | 0.053                                                | 182.9                              | 0.8                                            | 111.144                       |
| ( <i>E</i> )-2-Octenal        | Nutty, cooked flour, green, fat                            | 3                                                    | 190.1                              | 0.6                                            | 126.199                       |
| 1-Octen-3-ol                  | Raw mushroom, straw                                        | 1.5                                                  | 168.4                              | 0.5                                            | 128.215                       |
| Decanal                       | Fatty, citrusy, sweet, floral, waxy                        | 3                                                    | 209.0                              | 0.2                                            | 156.269                       |
| ( <i>E</i> )-2-Nonenal        | Fatty, woody                                               | 0.19                                                 | 205.0                              | 0.3                                            | 140.226                       |
| ( <i>E,E</i> )-2,4-Decadienal | Fatty, metallic, citrus, chicken                           | 0.077                                                | 244.6                              | 0.0                                            | 152.237                       |

a: Ref.1.

b: Ref.5.

c: The data were obtained from ChemSpider.com.

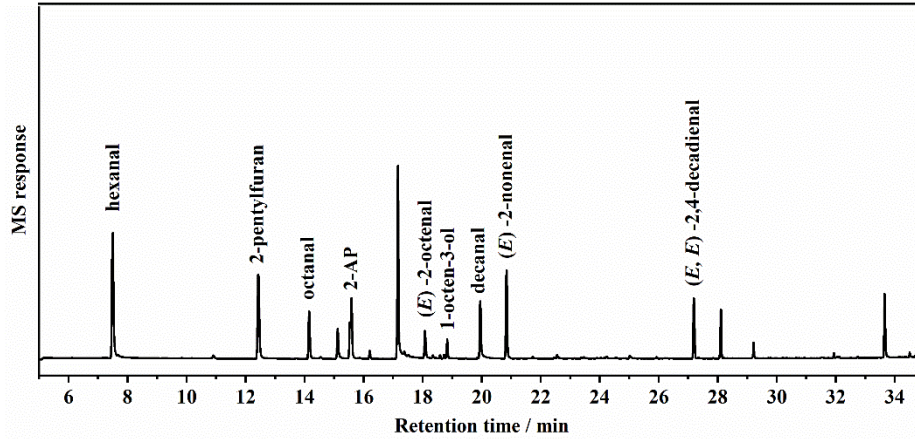

**Figure S1** GC-MS-SIM Chromatogram of rice sample. Amount of sample: 5.0g, extraction temperature: 80°C, extraction time: 30 min. The monitor ion for each compound was set as Table A2.

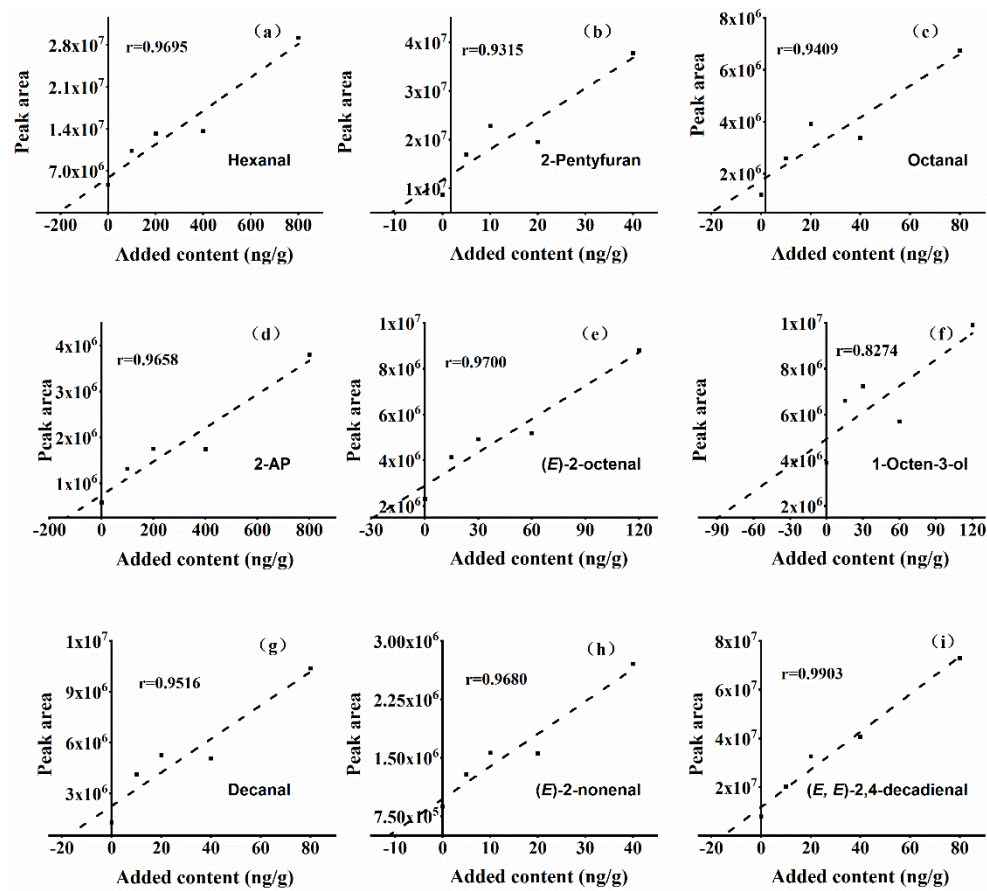

**Figure S2** Standard addition working curves for each volatile compound. (a): hexanal; (b): 2-pentylfuran; (c): octanal; (d): 2-AP; (e): (*E*)-2-octenal; (f): 1-octen-3-ol; (g): decanal; (h): (*E*)-2-nonenal; (i): (*E,E*)-2,4-decadienal. The working curves were plotted with the peak area of each compound and added content.

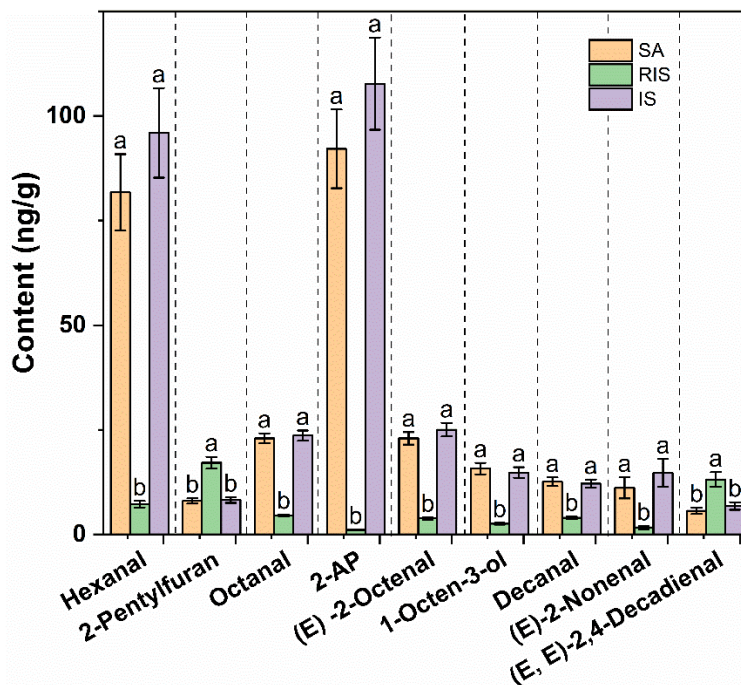

**Figure S3** Comparison of the results obtained by different methods. SA: standard addition method, the results were obtained by developed method; RIS: relative internal standard method, the results were the relative content to an internal standard (2-methyl-3-heptanone); IS: internal standard method, the results were obtained by multiplying each relative content by each correction factor.

### Method S1 Determination of correction factors

Two portions of one rice sample (5 g) were weighed into two 40 mL headspace vials. Then, 10  $\mu$ L of 1  $\mu$ g/mL of the internal standard (2-methyl-3-heptanone) was added, followed by either 10  $\mu$ L of ethanol or 10  $\mu$ L of a mixed standard solution (20  $\mu$ g/mL, 20  $\mu$ g/mL, 5  $\mu$ g/mL, 100  $\mu$ g/mL, 5  $\mu$ g/mL, 5  $\mu$ g/mL, 5  $\mu$ g/mL, 5  $\mu$ g/mL and 5  $\mu$ g/mL for hexanal, 2-pentylfuran, octanal, 2-AP, (*E*)-2-octenal, 1-octen-3-ol, decanal, (*E*)-2-decadienal, and (*E,E*)-2,4-decadienal, respectively) were added. Then SPME-GC-MS analysis was performed according to 2.3, and the determination was repeated three times. The peak area of each target compound and internal

standard were recorded, and the correction factor of the target compound was calculated according to Eqs. B1 and B2.

$$A_3' = A_1 / A_2 \times A_3 \quad \text{Eq. (B1)}$$

$A_3'$ : the corrected average peak area of the target compound in the spiked sample;  $A_1$ : the average peak area of internal standard in the unspiked sample;  $A_2$ : the average peak area of the internal standard in the spiked sample;  $A_3$ : the average peak area of the target compound in the spiked sample.

$$f = A_1 / (A_3' - A_4) \times C_2 / C_1 \quad \text{Eq. (B2)}$$

$f$ : correction factor;  $A_4$ : the average peak area of the target compound in the unspiked samples;  $C_2$ : the content of target compound added to the samples,  $\mu\text{g/mL}$ ;  $C_1$ : the content of the internal standard added to the samples,  $\mu\text{g/mL}$ .
